# Supplementary material
Source: HighWire-hosted journal article supplement (http://ajnr-stage2.highwire.org/highwire/filestream/107598/field_highwire_adjunct_files/0/0017.pdf)
Supplement: 0017.pdf [file 0017.pdf]

**Table 1.** Spontaneous intracranial hypotension (SIH) patient characteristics and outcomes following transvenous embolization of CSF-venous fistula (CSFVF).

| Patient | Age, Sex   | CSFVF Location | Symptoms                                 | Bern Score Pre-Embo | Bern Score Post-Embo | Change in symptoms Post-Embo? | ALPS-Index Pre-Embo | ALPS-Index Post-Embo |
|---------|------------|----------------|------------------------------------------|---------------------|----------------------|-------------------------------|---------------------|----------------------|
| 1       | 58, Female | Right T10      | Headache, hearing dysfunction, dizziness | 8                   | 4                    | Improved                      | 1.03                | 1.17                 |
| 2       | 70, Female | Right T6       | Headache                                 | 7                   | 0                    | Improved                      | 1.078               | 1.18                 |
| 3       | 66, Male   | Right T12      | Headache, tinnitus                       | 5                   | 3                    | No Significant Change         | 1.029               | 1.034                |
